# Supplementary material for: OUTPACE long duration stations: physical variability, context of biogeochemical sampling, and evaluation of sampling strategy
Source: Copernicus journal article supplement (doi:10.5194/bg-15-2125-2018), 2018-04-10
Supplement: Supplementary file 1 [file bg-15-2125-2018-supplement.pdf]

Supplement of Biogeosciences, 15, 2125–2147, 2018  
<https://doi.org/10.5194/bg-15-2125-2018-supplement>  
© Author(s) 2018. This work is distributed under  
the Creative Commons Attribution 4.0 License.

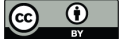

*Supplement of*

## **OUTPACE long duration stations: physical variability, context of biogeochemical sampling, and evaluation of sampling strategy**

**Alain de Verneil et al.**

*Correspondence to:* Alain de Verneil ([ajd11@nyu.edu](mailto:ajd11@nyu.edu))

The copyright of individual parts of the supplement might differ from the CC BY 4.0 License.

Supplementary material for  
"OUTPACE long duration stations: physical variability, context of  
biogeochemical sampling, and evaluation of sampling strategy"

by Alain de Verneil, Louise Rousselet, Andrea M. Doglioli, Anne A. Petrenko,  
Christophe Maes, Pascale Bouruet-Aubertot, and Thierry Moutin

In this document are the two supplementary figures referred to in the text of the  
article.

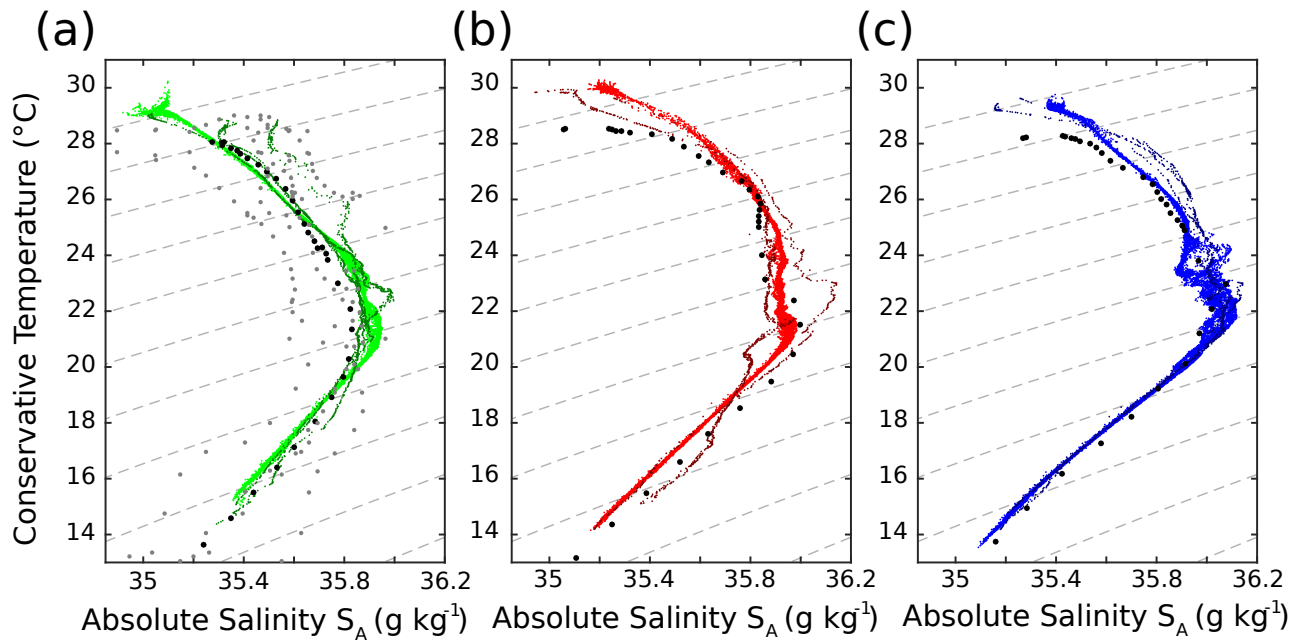

Figure S1: T-S Diagrams of LD stations and neighboring SD stations, as in Fig. 4, with World Ocean Atlas 2013 v2 climatological profiles at the LD station positions superimposed. Climatological monthly means shown in black, with extrema of T-S shown in gray, as calculated by  $\pm 2$  standard errors. Insufficient data at LDB and LDC preclude calculating these errors.

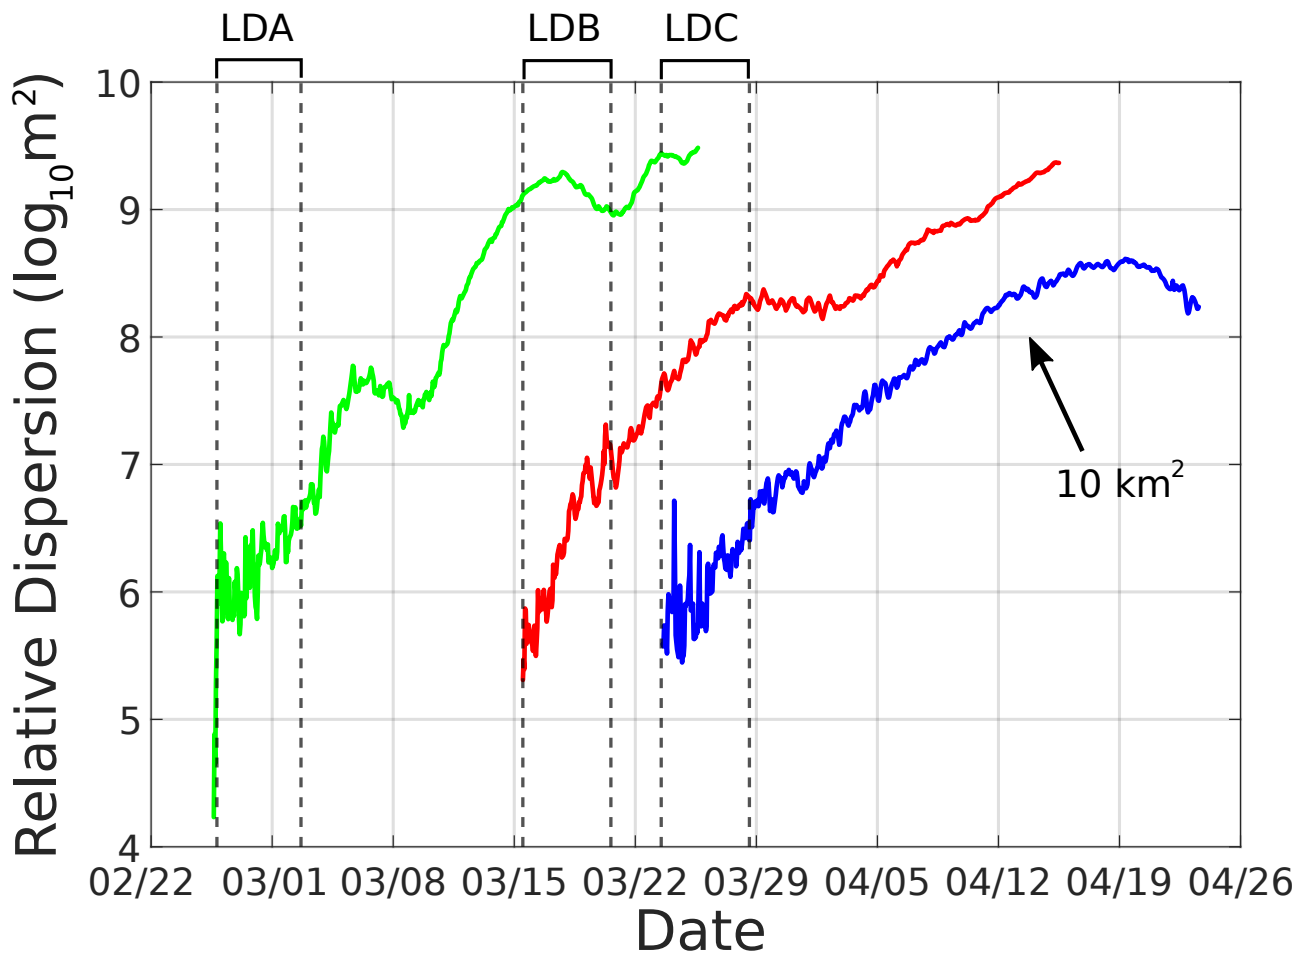

Figure S2: Time series of SVP drifter relative dispersion during LD stations. Sampling start and end times demarcated by dashed grey lines. Data for the first month after SVP deployments are shown.
